# Supplementary material
Source: PubMed Central journal article supplement (PMC6756186)

**Figure S7**

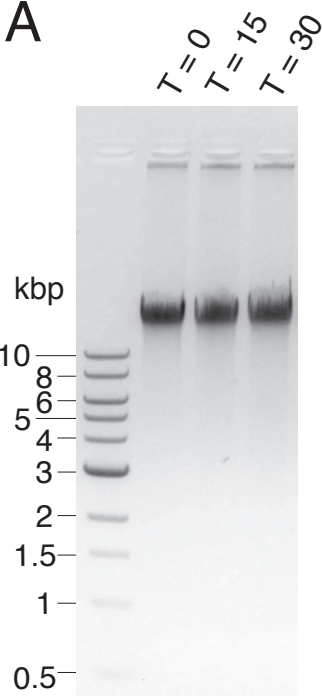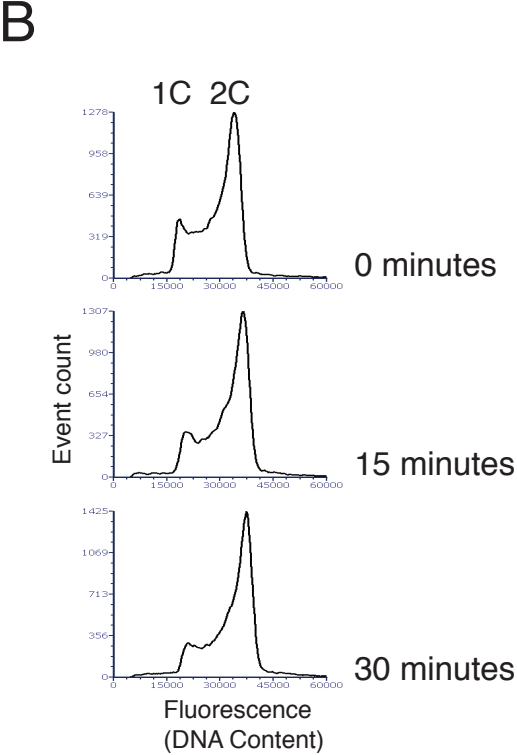

Supplement: NIHMS1538301-supplement-7.pdf [file NIHMS1538301-supplement-7.pdf]

**Figure S9**

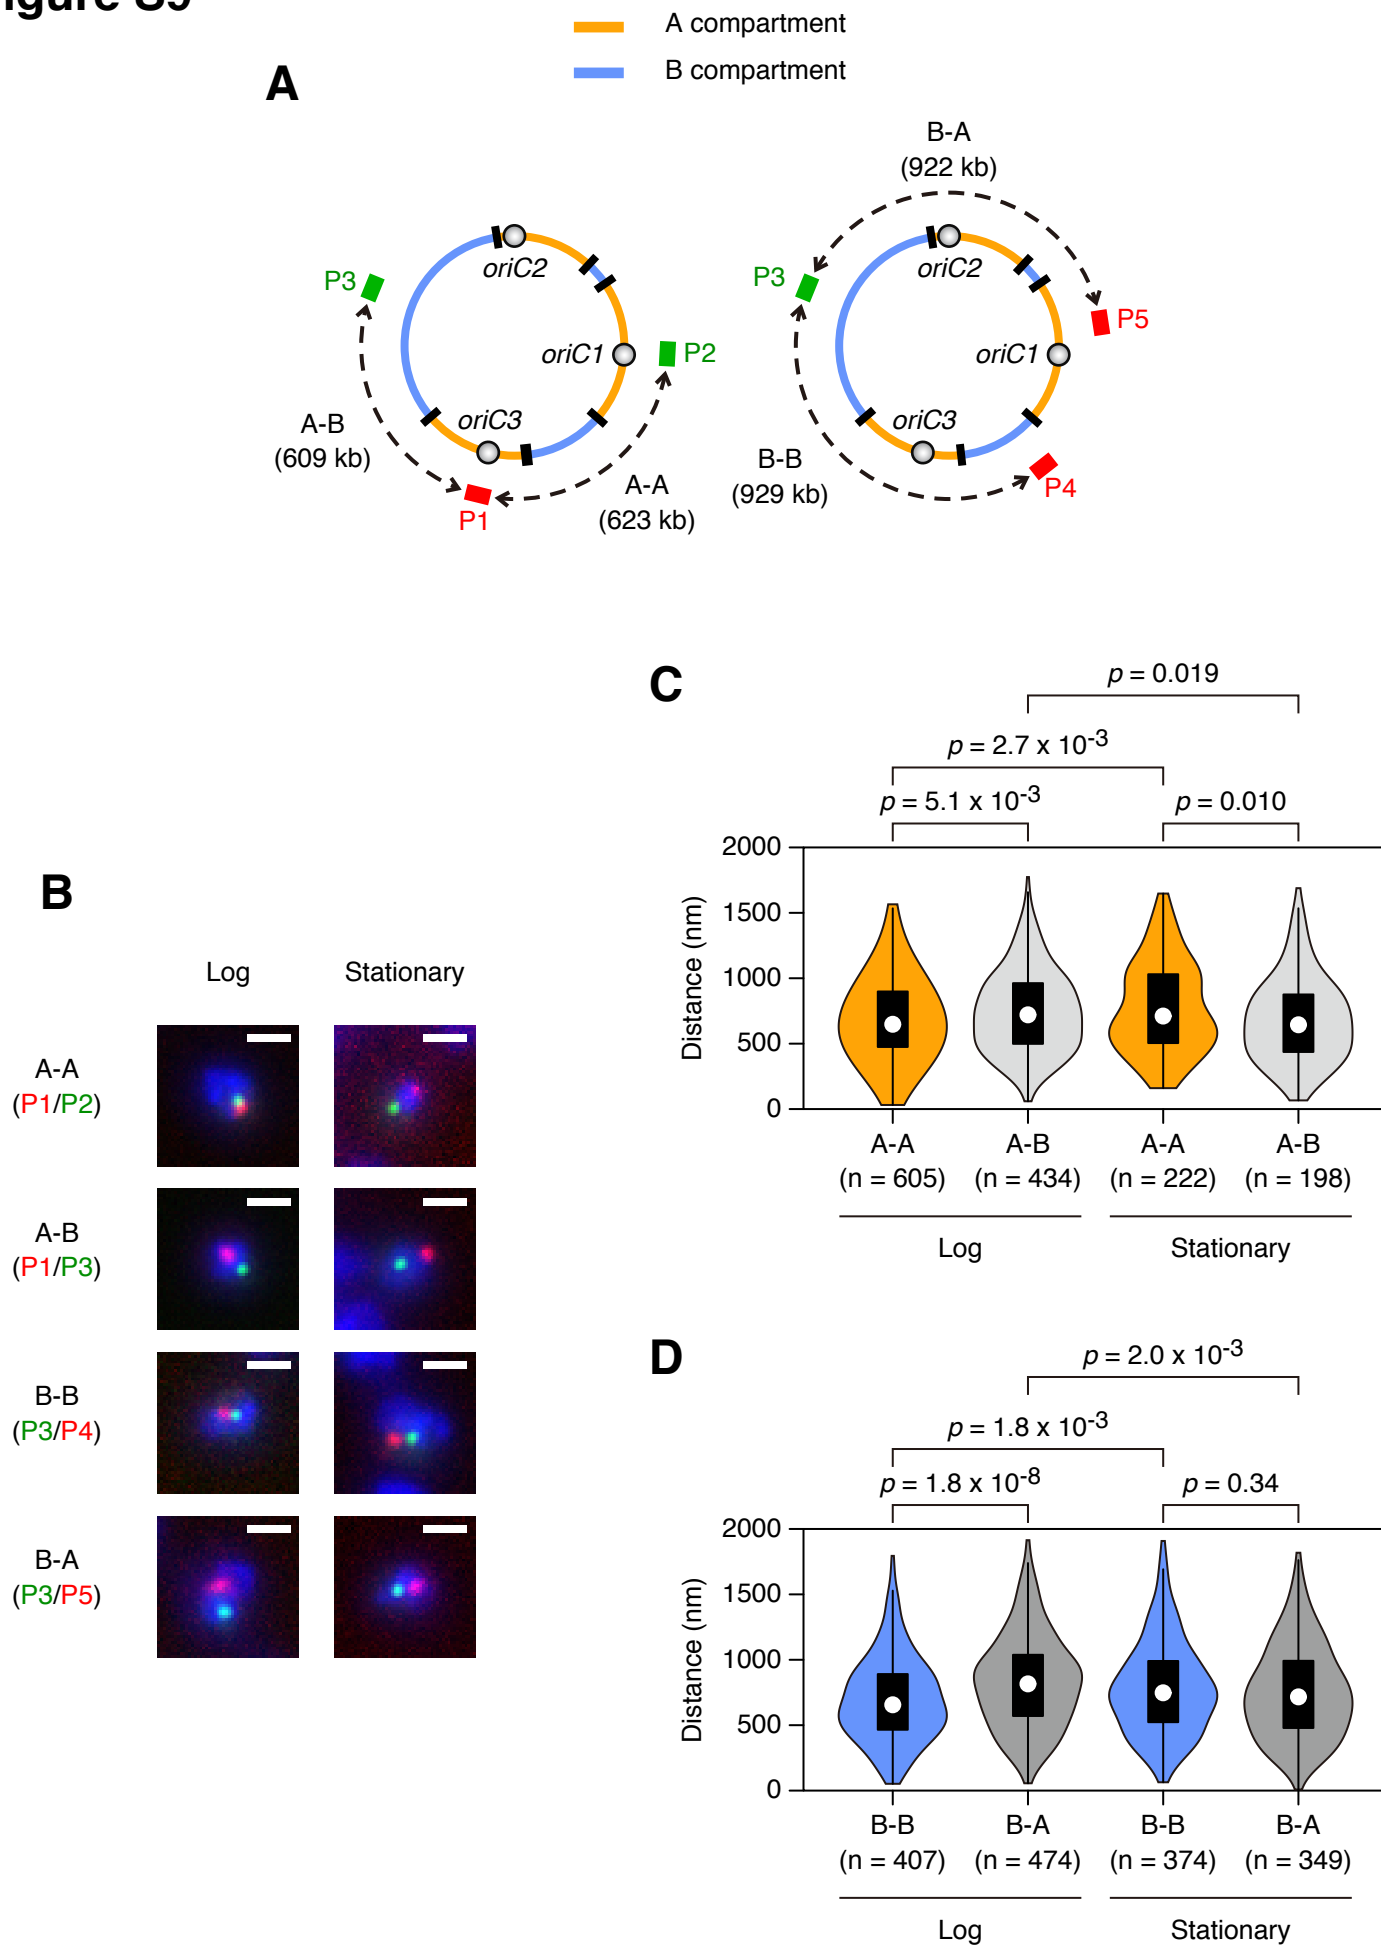

Supplement: NIHMS1538301-supplement-9.pdf [file NIHMS1538301-supplement-9.pdf]
